# Supplementary material for: Stronger gut microbiome modulatory effects by postbiotics than probiotics in a mouse colitis model
Source: PubMed Central journal article supplement (PMC9666507; doi:10.1038/s41538-022-00169-9), 2022-11-15
Supplement: 41538_2022_169_MOESM1_ESM.pdf [file 41538_2022_169_MOESM1_ESM.pdf]

**Supplementary Table 4. Correlation between 16 common bacterial species and their encoded top 20 metabolic pathways**

| Number | Common bacterial species              | Postbiotic group | Probiotic group |
|--------|---------------------------------------|------------------|-----------------|
| 1      | <i>Akkermansia muciniphila</i>        | +                | +               |
| 2      | <i>Alistipes</i> sp.                  | +                | +               |
| 3      | <i>Bacteroidales bacterium</i> M1     | +                | +               |
| 4      | <i>Bacteroides</i> sp.                | +                | +               |
| 5      | <i>Muribaculaceae</i> sp.             | +                | +               |
| 6      | <i>Bacteroides dorei/vulgatus</i>     | –                | –               |
| 7      | <i>Bacteroides intestinalis</i>       | –                | –               |
| 8      | <i>Escherichia coli</i>               | –                | –               |
| 9      | <i>Lactobacillus animalis/murinus</i> | –                | –               |
| 10     | <i>Bacteroides acidifaciens</i>       | –                | +               |
| 11     | <i>Bacteroides caecimuris</i>         | +                | –               |
| 12     | <i>Clostridiales</i> sp.              | –                | +               |
| 13     | <i>Clostridium</i> sp.                | –                | +               |
| 14     | <i>Erysipelotrichaceae</i> sp.        | –                | +               |
| 15     | <i>Lachnospiraceae</i> sp.            | –                | +               |
| 16     | <i>Prevotella</i> sp.                 | +                | –               |

Note: +, positive association; –, inverse association.





**Supplementary Table 6. Criteria for scoring disease activity index**

| Score | Weight loss (%) | Stool consistency | Occult blood or gross bleeding |
|-------|-----------------|-------------------|--------------------------------|
| 0     | None            | Normal            | Negative                       |
| 1     | 1–5             | Loose stool       | Negative                       |
| 2     | 5–10            | Loose stool       | Hemoccult positive             |
| 3     | 10–15           | Diarrhea          | Hemoccult positive             |
| 4     | >15             | Diarrhea          | Gross bleeding                 |

Note: disease activity index = (combined score of weight loss, stool consistency, and occult blood or gross bleeding)/3

**Supplementary Table 7. Histological grading of colitis**

| Score | Severity of inflammation | Depth of injury      | Crypt damage                     |
|-------|--------------------------|----------------------|----------------------------------|
| 0     | None                     | None                 | None                             |
| 1     | Slight                   | Mucosa               | Basal 1/3 damaged                |
| 2     | Moderate                 | Mucosa and submucosa | Basal 2/3 damaged                |
| 3     | Severe                   | Transmural           | Only surface epithelium intact   |
| 4     | –                        | –                    | Entire crypt and epithelium lost |

Note: the histological score for each mouse was a sum of the score of severity of inflammation, depth of injury, and crypt damage.
